# Supplementary material for: Application of Artificial Neural Network to the Prediction of Tensile Properties in High-Strength Low-Carbon Bainitic Steels
Source: MDPI journal article supplement (doi:10.3390/met11081314), 2021-08-19
Supplement: s1 [file s1]

# Application of Artificial Neural Network to the Prediction of Tensile Properties in High-Strength Low-Carbon Bainitic Steels

Sang-In Lee, Seung-Hyeok Shin and Byoungchul Hwang \*

Department of Materials Science and Engineering, Seoul National University of Science and Technology, Seoul, 01811, Republic of Korea; sangin19@kist.re.kr (S.-I.L.); seunghyeok527@seoultech.ac.kr (S.-H.S.)

\* Correspondence: bhwang@seoultech.ac.kr

**Table S1.** Multi linear regression (MLR) model for predicting the yield strength, yield-to-tensile ratio, and uniform elongation of low-carbon high-strength bainitic steels based on the fractions of microstructure constituents.

|                                                                                                                                                                                                                                                   |                                                                                                                      |
|---------------------------------------------------------------------------------------------------------------------------------------------------------------------------------------------------------------------------------------------------|----------------------------------------------------------------------------------------------------------------------|
| The general expression for standard MLA is given by                                                                                                                                                                                               |                                                                                                                      |
| $Y = a_0 + a_1x_1 + a_2x_2 + \dots + a_nx_n + \varepsilon$                                                                                                                                                                                        |                                                                                                                      |
| where $Y$ is the dependent variable, $x_i$ and $n$ are independent variables, $a_i$ are the coefficients, and $\varepsilon$ is the random error. The MLR between constituent fractions and tensile properties was done with 20 training datasets. |                                                                                                                      |
| Empirical equations                                                                                                                                                                                                                               | Yield strength (MPa) = $1934.747 - (16.2332V_{PF} + 13.8634V_{AF} + 13.4355V_{GB} + 12.3704V_{BF})$ , $R^2=0.5816$   |
|                                                                                                                                                                                                                                                   | Yield-to-tensile ratio = $1.138229 - (0.00246V_{PF} + 0.00286V_{AF} + 0.00439V_{GB} + 0.00365V_{BF})$ , $R^2=0.7829$ |
|                                                                                                                                                                                                                                                   | Uniform elongation (%) = $-53.506 + (0.72770V_{PF} - 0.61498V_{AF} - 0.61225V_{GB} - 0.59962V_{BF})$ , $R^2=0.7842$  |

**Table S2.** Process to calculate the index of relative importance ( $I_{RI}$ ).

| Number | Process                                                                                                                                                                |
|--------|------------------------------------------------------------------------------------------------------------------------------------------------------------------------|
| 1      | The % band of $i$ th input parameter = $((X_i)_{Maximum} - (X_i)_{Minimum})/100$                                                                                       |
| 2      | The 6 % band of each input parameter was considered i.e., +3 % and -3 %                                                                                                |
| 3      | As a result, input parameter $X_i$ has two row matrices $[+3 \% X_1 + X_2 + X_3 + X_4]$ and $[-3 \% X_1 + X_2 + X_3 + X_4]$                                            |
| 4      | When these two row matrices were passed through the ANN model, $(Y_i)_{+3\%X_i}$ and $(Y_i)_{-3\%X_i}$ were predicted                                                  |
| 5      | The difference $\Delta(y_i) = (Y_i)_{+3\%X_i} - (Y_i)_{-3\%X_i}$ was calculated                                                                                        |
| 6      | The index of relative importance ( $I_{RI}$ ) of input parameter $X_i$ was calculated from the formula<br>: $I_{RI} = \Delta(y_i)/((y_i)_{Maximum} - (y_i)_{Minimum})$ |

The process (from step 1 to step 6) was repeated to obtain the  $I_{RI}$  for the remaining input parameters. During one input parameter was varied by a  $\pm 3$  % offset, the other input parameters were kept constant. After adding the  $\pm 3$  % variation to all the input parameters, 12 combinations of input parameter datasets were formed. These datasets were provided to the ANN model to predict the respective output parameters and thereby to calculate  $I_{RI}$  for each input parameter.
